# Supplementary material for: NRF2 negatively regulates primary ciliogenesis and hedgehog signaling
Source: PubMed Central journal article supplement (PMC7043785; doi:10.1371/journal.pbio.3000620), 2020-02-13

# S5 Fig

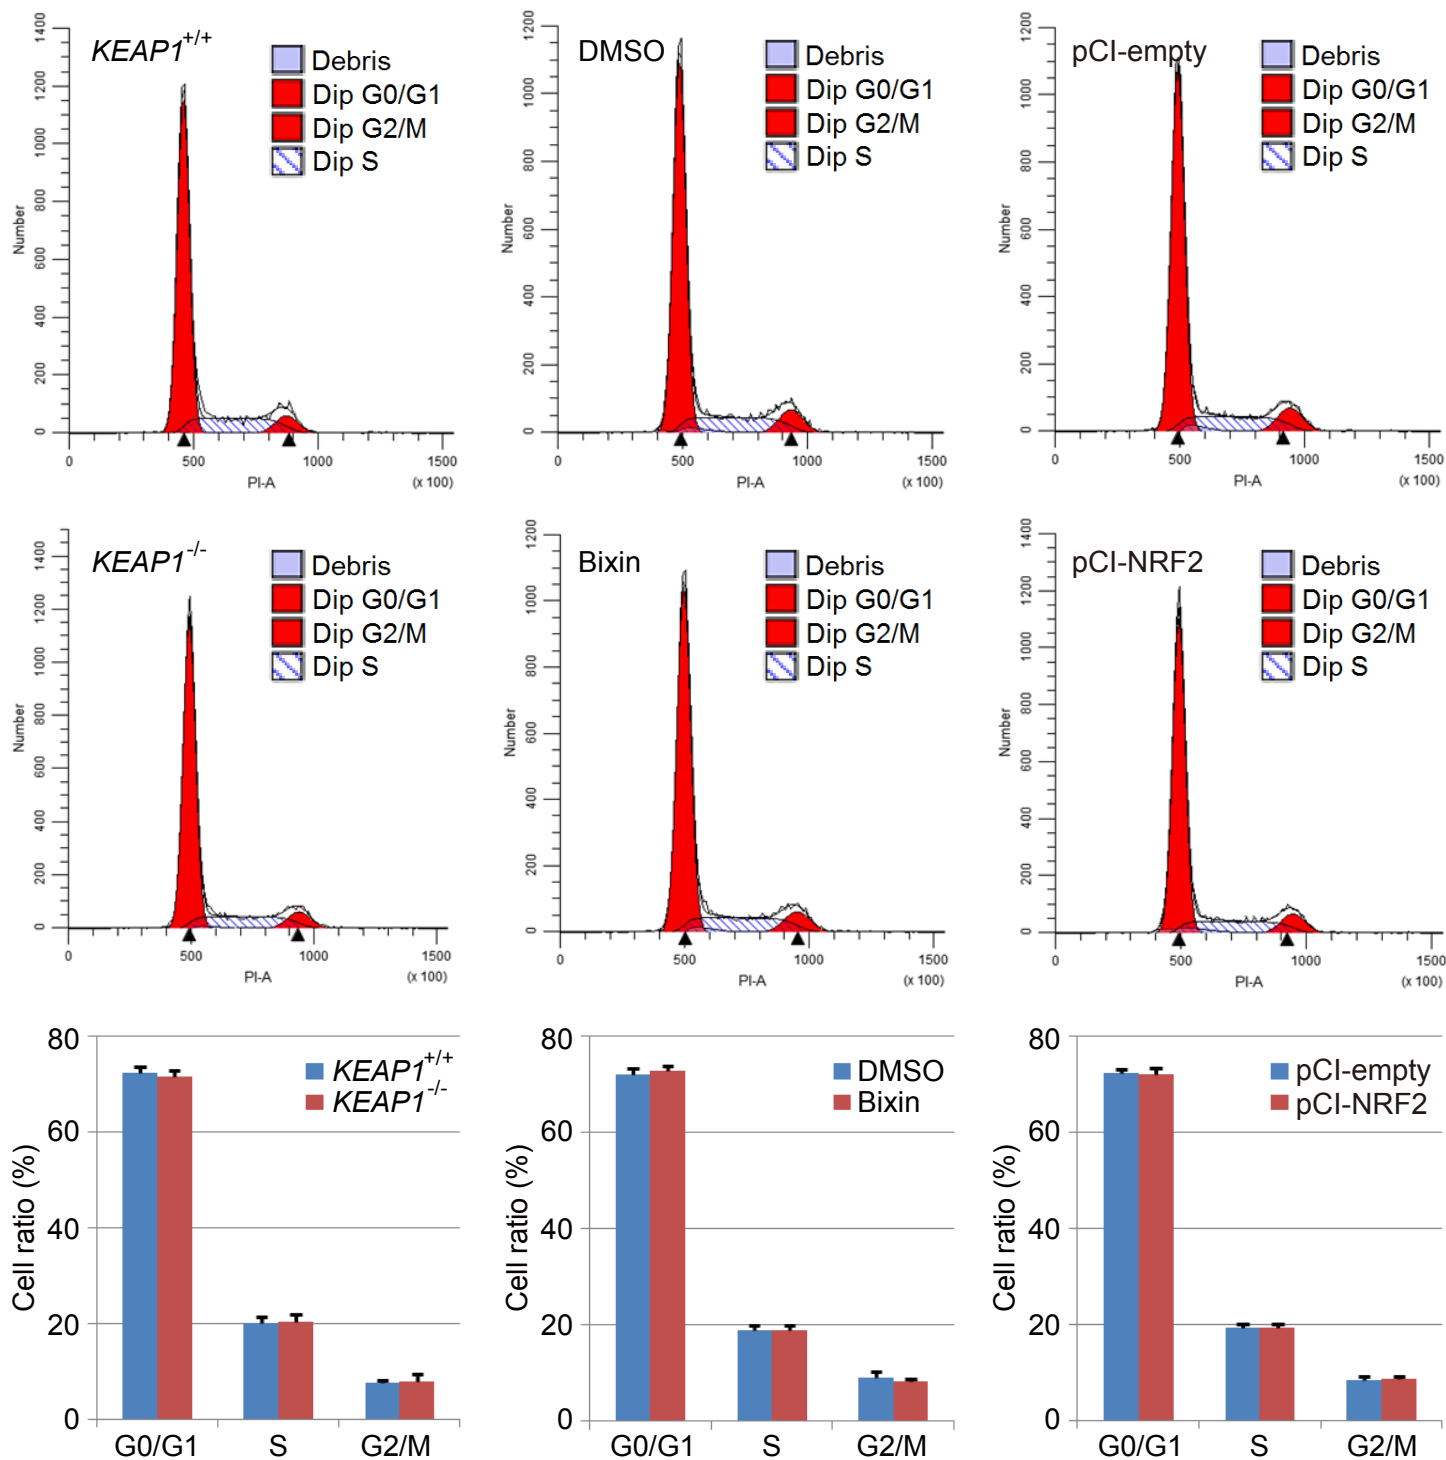

Supplement: pbio.3000620.s005.pdf [file pbio.3000620.s005.pdf]
