# Supplementary material for: NRF2 negatively regulates primary ciliogenesis and hedgehog signaling
Source: PubMed Central journal article supplement (PMC7043785; doi:10.1371/journal.pbio.3000620), 2020-02-13

# S6 Fig

**A** Human *PTCH1* ARE-WT (41bp): TTCTGGAAACTCAAATGACTCTGCTCAAGAATGGCTACGTC  
 Human *PTCH1* ARE-MU (41bp): TTCTGGAAACTCAAACTCTCTCGTCAAGAATGGCTACGTC  
 Mouse *Ptch1* ARE-WT (41bp): TCTTTTCTTCAGTTATGACTCAGAAATCCAGTGTTTGGCTAA  
 Mouse *Ptch1* ARE-MU (41bp): TCTTTTCTTCAGTTAACTCTCACTATCCAGTGTTTGGCTAA

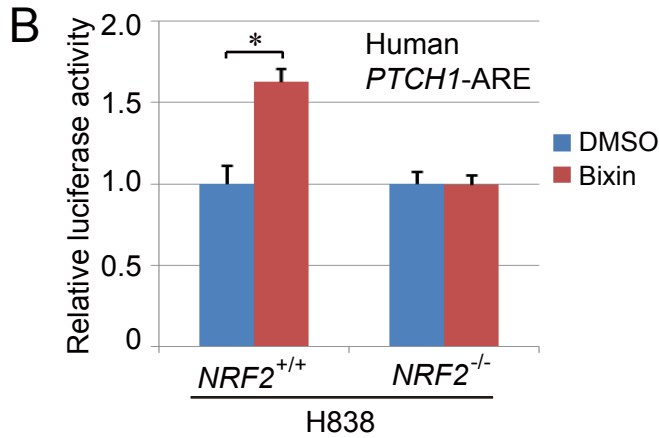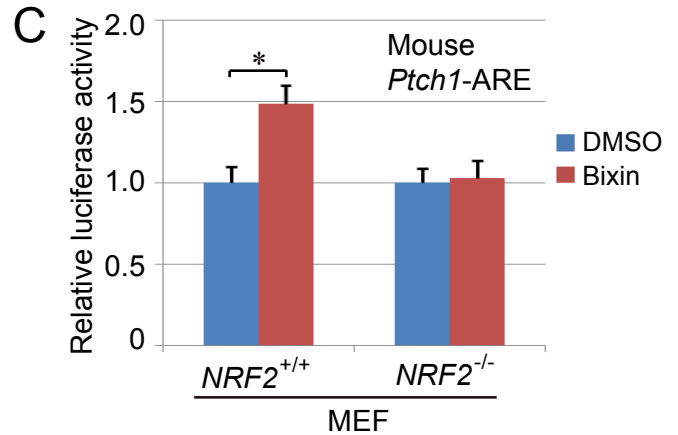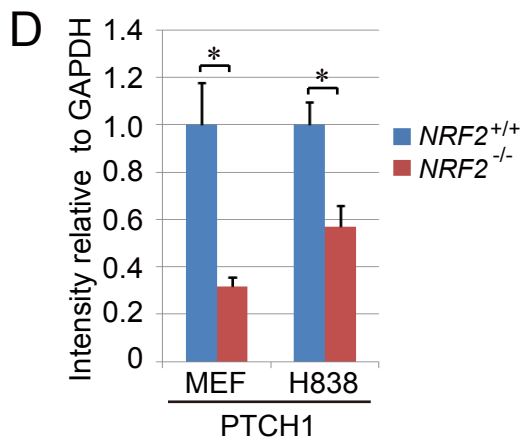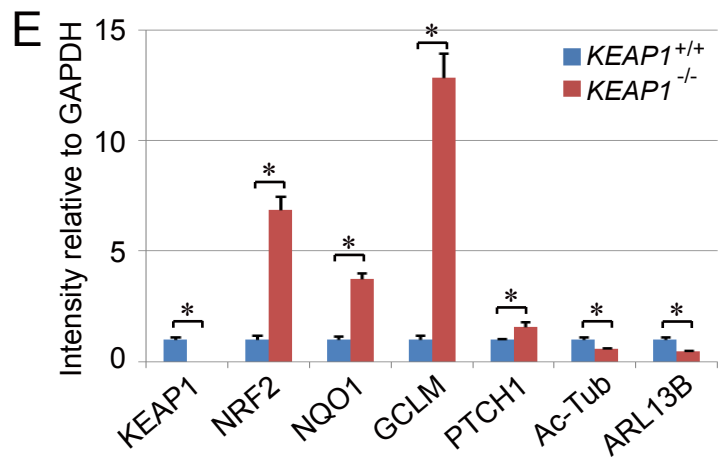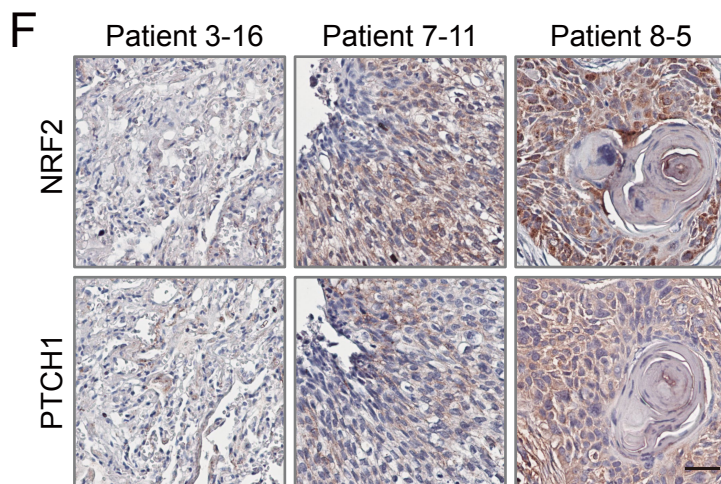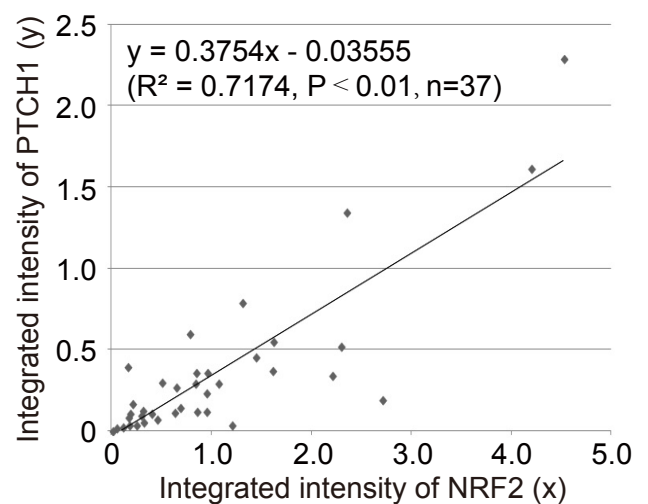

Supplement: pbio.3000620.s006.pdf [file pbio.3000620.s006.pdf]
